# Supplementary material for: Genetic complexity of cassava brown streak disease: insights from qPCR-based viral titer analysis and genome-wide association studies
Source: Front Plant Sci. 2024 Mar 13;15:1365132. doi: 10.3389/fpls.2024.1365132 (PMC10965612; doi:10.3389/fpls.2024.1365132)
Supplement: Supplementary file 3 [file Table_1.xlsx]

## Sheet: supp1
Supplementary Table 1
Gene_ontology	Mapped_IDs	NAME	Parent	parent	Families and Subfamillies
GO:0009685	MANES|EnsemblGenome=MANES_02G170100|UniProtKB=A0A2C9WF23	gibberellin metabolic process	carboxylic acid metabolic process		80
GO:0005829	MANES|EnsemblGenome=MANES_11G120800|UniProtKB=A0A2C9V0M6,MANES|EnsemblGenome=MANES_05G076500|UniProtKB=A0A2C9VU66,MANES|EnsemblGenome=MANES_17G097200|UniProtKB=A0A2C9U6N7	cytosol	cytoplasm	canonical inflammasome complex;cytosolic ribosome;chaperonin-containing T-complex	5012
GO:0005886	MANES|EnsemblGenome=MANES_02G170400|UniProtKB=A0A2C9WHC2,MANES|EnsemblGenome=MANES_02G170200|UniProtKB=A0A2C9WH39,MANES|EnsemblGenome=MANES_04G006600|UniProtKB=A0A2C9VZS8,MANES|EnsemblGenome=MANES_05G026400|UniProtKB=A0A2C9VST2,MANES|EnsemblGenome=MANES_13G082200|UniProtKB=A0A2C9UQ72,MANES|EnsemblGenome=MANES_02G170500|UniProtKB=A0A2C9WG83,MANES|EnsemblGenome=MANES_02G170600|UniProtKB=A0A2C9WG73,…	plasma membrane	cell periphery	external side of plasma membrane;plasma membrane region;leading edge membrane;cytoplasmic side of plasma membrane;sarcolemma;plasma membrane protein complex;extrinsic component of plasma membrane	8271
GO:0016874	MANES|EnsemblGenome=MANES_17G097400|UniProtKB=A0A2C9U6M1,MANES|EnsemblGenome=MANES_11G120800|UniProtKB=A0A2C9V0M6	ligase activity	catalytic activity	proton-transporting ATP synthase activity, rotational mechanism	835
GO:0000981	MANES|EnsemblGenome=MANES_18G097600|UniProtKB=A0A2C9U2X8	DNA-binding transcription factor activity, RNA polymerase II-specific	DNA-binding transcription factor activity	DNA-binding transcription activator activity, RNA polymerase II-specific;DNA-binding transcription repressor activity, RNA polymerase II-specific	3242
GO:0000339	MANES|EnsemblGenome=MANES_13G142600|UniProtKB=A0A2C9UTR8	RNA cap binding	RNA binding		60
GO:0008541	MANES|EnsemblGenome=MANES_13G081000|UniProtKB=A0A2C9UR47	proteasome regulatory particle, lid subcomplex	proteasome regulatory particle		41
PC00259	MANES|EnsemblGenome=MANES_13G082000|UniProtKB=A0A2C9UR37	general transcription factor	RNA metabolism protein		422
GO:0006334	MANES|EnsemblGenome=MANES_13G082700|UniProtKB=A0A251JYH8	nucleosome assembly	chromatin organization		60
GO:0009791	MANES|EnsemblGenome=MANES_18G097700|UniProtKB=A0A2C9U1S9	post-embryonic development	multicellular organism development	seed development;reproductive shoot system development;vegetative to reproductive phase transition of meristem	199
PC00195	MANES|EnsemblGenome=MANES_18G099100|UniProtKB=A0A2C9U255,MANES|EnsemblGenome=MANES_18G116200|UniProtKB=A0A2C9U3H0,MANES|EnsemblGenome=MANES_04G006800|UniProtKB=A0A2C9VYH7	protein phosphatase	protein modifying enzyme		998
GO:0003723	MANES|EnsemblGenome=MANES_11G120800|UniProtKB=A0A2C9V0M6,MANES|EnsemblGenome=MANES_01G030600|UniProtKB=A0A2C9WJU5	RNA binding	nucleic acid binding	snoRNA binding;mRNA binding;RNA cap binding;tRNA binding;double-stranded RNA binding;pre-mRNA binding;snRNA binding;rRNA binding;single-stranded RNA binding	3315
GO:0016857	MANES|EnsemblGenome=MANES_05G076500|UniProtKB=A0A2C9VU66,MANES|EnsemblGenome=MANES_05G026500|UniProtKB=A0A2C9VSP6	racemase and epimerase activity, acting on carbohydrates and derivatives	isomerase activity		106
GO:0009888	MANES|EnsemblGenome=MANES_18G097700|UniProtKB=A0A2C9U1S9	tissue development	anatomical structure development	mesoderm development;endoderm development;epithelium development;tissue morphogenesis;cartilage development;mesenchyme development;muscle tissue development;ectoderm development;epidermis development;biomineral tissue development	395
GO:0009416	MANES|EnsemblGenome=MANES_05G027100|UniProtKB=A0A2C9VSU0,MANES|EnsemblGenome=MANES_02G170100|UniProtKB=A0A2C9WF23	response to light stimulus	response to radiation	cellular response to light stimulus;response to UV	309
PC00228	MANES|EnsemblGenome=MANES_05G025900|UniProtKB=A0A251KS14	tubulin	microtubule or microtubule-binding cytoskeletal protein		124
GO:0005634	MANES|EnsemblGenome=MANES_04G007000|UniProtKB=A0A2C9VYD9,MANES|EnsemblGenome=MANES_05G027100|UniProtKB=A0A2C9VSU0,MANES|EnsemblGenome=MANES_13G081400|UniProtKB=A0A2C9UQ62,MANES|EnsemblGenome=MANES_04G006600|UniProtKB=A0A2C9VZS8,MANES|EnsemblGenome=MANES_17G097200|UniProtKB=A0A2C9U6N7,MANES|EnsemblGenome=MANES_05G025900|UniProtKB=A0A251KS14,MANES|EnsemblGenome=MANES_05G026700|UniProtKB=A0A2C9VSR4,…	nucleus	intracellular membrane-bounded organelle	nuclear protein-containing complex;nuclear lumen;nuclear envelope	13352
GO:0000151	MANES|EnsemblGenome=MANES_17G098600|UniProtKB=A0A2C9U6N0	ubiquitin ligase complex	transferase complex	nuclear ubiquitin ligase complex;cullin-RING ubiquitin ligase complex	696
GO:0003924	MANES|EnsemblGenome=MANES_05G075900|UniProtKB=A0A2C9VWN1	GTPase activity	ribonucleoside triphosphate phosphatase activity		854
GO:0044282	MANES|EnsemblGenome=MANES_05G076500|UniProtKB=A0A2C9VU66	small molecule catabolic process	catabolic process	organic acid catabolic process;nucleobase-containing small molecule catabolic process	909
PC00009	MANES|EnsemblGenome=MANES_04G006100|UniProtKB=A0A2C9VYJ6	DNA metabolism protein	protein class	DNA polymerase processivity factor;DNA methyltransferase;exodeoxyribonuclease;DNA strand-pairing protein;endodeoxyribonuclease;DNA topoisomerase;DNA glycosylase;DNA ligase;DNA-directed DNA polymerase;DNA helicase;replication origin binding protein;primase;DNA photolyase;damaged DNA-binding protein	909
GO:0032991	MANES|EnsemblGenome=MANES_05G025900|UniProtKB=A0A251KS14,MANES|EnsemblGenome=MANES_13G082700|UniProtKB=A0A251JYH8	protein-containing complex	cellular_component	membrane protein complex;Prp19 complex;proteasome regulatory particle;radial spoke;nuclear protein-containing complex;mitochondrial protein-containing complex;canonical inflammasome complex;MCM complex;intraciliary transport particle;outer kinetochore;collagen trimer;catalytic complex;intracellular protein-containing complex;Arp2/3 protein complex;protein-lipid complex;proteasome accessory comple…	10446
GO:0065002	MANES|EnsemblGenome=MANES_05G075600|UniProtKB=A0A2C9VU86	intracellular protein transmembrane transport	protein transmembrane transport	protein import into chloroplast stroma;protein import into peroxisome matrix;post-translational protein targeting to membrane, translocation;protein import into mitochondrial matrix	217
GO:0061631	MANES|EnsemblGenome=MANES_05G026300|UniProtKB=A0A2C9VSR8	ubiquitin conjugating enzyme activity	ubiquitin-protein transferase activity		232
GO:1903046	MANES|EnsemblGenome=MANES_05G025900|UniProtKB=A0A251KS14	meiotic cell cycle process	sexual reproduction	chromosome organization involved in meiotic cell cycle;meiotic nuclear division;reciprocal meiotic recombination;meiosis I cell cycle process;meiotic chromosome segregation	154
GO:0016102	MANES|EnsemblGenome=MANES_02G170100|UniProtKB=A0A2C9WF23	diterpenoid biosynthetic process	terpenoid biosynthetic process		63
GO:0140098	MANES|EnsemblGenome=MANES_11G120800|UniProtKB=A0A2C9V0M6	catalytic activity, acting on RNA	catalytic activity, acting on a nucleic acid	RNA methyltransferase activity;catalytic activity, acting on a rRNA;RNA polymerase activity;RNA nuclease activity	1111
GO:0003743	MANES|EnsemblGenome=MANES_05G027000|UniProtKB=A0A2C9VSR2	translation initiation factor activity	translation factor activity, RNA binding		201
GO:0004857	MANES|EnsemblGenome=MANES_13G082400|UniProtKB=A0A2C9URC6	enzyme inhibitor activity	enzyme regulator activity	protein kinase inhibitor activity;phosphatase inhibitor activity;peptidase inhibitor activity	667
GO:0001727	MANES|EnsemblGenome=MANES_18G097800|UniProtKB=A0A2C9U252	lipid kinase activity	kinase activity		139
PC00091	MANES|EnsemblGenome=MANES_08G012600|UniProtKB=A0A2C9VEQ6	dehydratase	lyase		433
PC00148	MANES|EnsemblGenome=MANES_13G083600|UniProtKB=A0A2C9US07	RNA splicing factor	RNA processing factor		927
GO:0005730	MANES|EnsemblGenome=MANES_13G142500|UniProtKB=A0A2C9URQ4	nucleolus	nuclear lumen	RNA polymerase I complex;t-UTP complex	630
GO:0046854	MANES|EnsemblGenome=MANES_18G097800|UniProtKB=A0A2C9U252	phosphatidylinositol phosphate biosynthetic process	phosphatidylinositol biosynthetic process		140
PC00261	MANES|EnsemblGenome=MANES_13G082300|UniProtKB=A0A2C9UQ19	histone modifying enzyme	chromatin/chromatin-binding, or -regulatory protein		348
GO:0019438	MANES|EnsemblGenome=MANES_13G081900|UniProtKB=A0A2C9UR55	aromatic compound biosynthetic process	cellular aromatic compound metabolic process	nucleobase-containing compound biosynthetic process;aromatic amino acid family biosynthetic process;purine-containing compound biosynthetic process;heme biosynthetic process	1481
GO:0044550	MANES|EnsemblGenome=MANES_13G081900|UniProtKB=A0A2C9UR55	secondary metabolite biosynthetic process	biosynthetic process		162
PC00158	MANES|EnsemblGenome=MANES_05G025600|UniProtKB=A0A2C9VUW0	mitochondrial carrier protein	secondary carrier transporter		123
GO:0007020	MANES|EnsemblGenome=MANES_05G025900|UniProtKB=A0A251KS14	microtubule nucleation	microtubule polymerization		39
GO:0016407	MANES|EnsemblGenome=MANES_13G082500|UniProtKB=A0A2C9UQ13	acetyltransferase activity	acyltransferase activity, transferring groups other than amino-acyl groups	N-acetyltransferase activity	396
GO:0006511	MANES|EnsemblGenome=MANES_17G098600|UniProtKB=A0A2C9U6N0,MANES|EnsemblGenome=MANES_05G026300|UniProtKB=A0A2C9VSR8	ubiquitin-dependent protein catabolic process	modification-dependent protein catabolic process	proteasome-mediated ubiquitin-dependent protein catabolic process;ubiquitin-dependent protein catabolic process via the multivesicular body sorting pathway	1496
GO:0016020	MANES|EnsemblGenome=MANES_17G097400|UniProtKB=A0A2C9U6M1,MANES|EnsemblGenome=MANES_17G097800|UniProtKB=A0A2C9U8A0,MANES|EnsemblGenome=MANES_18G098800|UniProtKB=A0A2C9U1T5,MANES|EnsemblGenome=MANES_08G012800|UniProtKB=A0A2C9VDZ5,MANES|EnsemblGenome=MANES_05G026800|UniProtKB=A0A2C9VV56	membrane	cellular anatomical entity	outer membrane;nuclear outer membrane-endoplasmic reticulum membrane network;plasma membrane region;extrinsic component of membrane;organelle membrane;membrane microdomain;membrane protein complex;coated membrane;leaflet of membrane bilayer;respirasome;plasma membrane;photosynthetic membrane;side of membrane	14882
GO:0005525	MANES|EnsemblGenome=MANES_05G075900|UniProtKB=A0A2C9VWN1,MANES|EnsemblGenome=MANES_05G025900|UniProtKB=A0A251KS14	GTP binding	purine ribonucleotide binding		596
GO:0006468	MANES|EnsemblGenome=MANES_02G170400|UniProtKB=A0A2C9WHC2,MANES|EnsemblGenome=MANES_02G170200|UniProtKB=A0A2C9WH39,MANES|EnsemblGenome=MANES_04G006600|UniProtKB=A0A2C9VZS8,MANES|EnsemblGenome=MANES_02G170500|UniProtKB=A0A2C9WG83,MANES|EnsemblGenome=MANES_02G170600|UniProtKB=A0A2C9WG73,MANES|EnsemblGenome=MANES_04G006700|UniProtKB=A0A2C9VYF7	protein phosphorylation	phosphorylation	peptidyl-threonine phosphorylation;peptidyl-serine phosphorylation;peptidyl-tyrosine phosphorylation	2115
GO:0008374	MANES|EnsemblGenome=MANES_13G082500|UniProtKB=A0A2C9UQ13,MANES|EnsemblGenome=MANES_18G115900|UniProtKB=A0A2C9U3E4,MANES|EnsemblGenome=MANES_18G116000|UniProtKB=A0A2C9U2G9	O-acyltransferase activity	acyltransferase activity, transferring groups other than amino-acyl groups		395
PC00137	MANES|EnsemblGenome=MANES_18G097800|UniProtKB=A0A2C9U252	kinase	transferase	carbohydrate kinase;nucleotide kinase;amino acid kinase	612
GO:0004407	MANES|EnsemblGenome=MANES_04G007000|UniProtKB=A0A2C9VYD9	histone deacetylase activity	hydrolase activity, acting on carbon-nitrogen (but not peptide) bonds, in linear amides		59
GO:0004553	MANES|EnsemblGenome=MANES_01G029600|UniProtKB=A0A2C9WJT6	hydrolase activity, hydrolyzing O-glycosyl compounds	hydrolase activity, acting on glycosyl bonds	lysozyme activity;glucosidase activity;chitinase activity	800
GO:0006833	MANES|EnsemblGenome=MANES_08G012800|UniProtKB=A0A2C9VDZ5	water transport	fluid transport		70
GO:0007166	MANES|EnsemblGenome=MANES_02G170400|UniProtKB=A0A2C9WHC2,MANES|EnsemblGenome=MANES_02G170200|UniProtKB=A0A2C9WH39,MANES|EnsemblGenome=MANES_02G170500|UniProtKB=A0A2C9WG83,MANES|EnsemblGenome=MANES_02G170600|UniProtKB=A0A2C9WG73	cell surface receptor signaling pathway	signal transduction	extrinsic apoptotic signaling pathway;receptor signaling pathway via STAT;cell surface receptor signaling pathway involved in cell-cell signaling;immune response-regulating cell surface receptor signaling pathway;integrin-mediated signaling pathway;smoothened signaling pathway;lipopolysaccharide-mediated signaling pathway;cytokine-mediated signaling pathway;Notch signaling pathway;enzyme-linked r…	1342
GO:0052689	MANES|EnsemblGenome=MANES_13G082400|UniProtKB=A0A2C9URC6	carboxylic ester hydrolase activity	hydrolase activity, acting on ester bonds	lysophospholipase activity;triglyceride lipase activity;phospholipase A2 activity	647
GO:0004252	MANES|EnsemblGenome=MANES_16G104900|UniProtKB=A0A2C9UAN3	serine-type endopeptidase activity	endopeptidase activity		237
GO:0008233	MANES|EnsemblGenome=MANES_13G083000|UniProtKB=A0A2C9UQ58	peptidase activity	hydrolase activity	endopeptidase activity;ubiquitin-like protein peptidase activity;cysteine-type peptidase activity;metallopeptidase activity;exopeptidase activity	1857
GO:0005768	MANES|EnsemblGenome=MANES_02G169500|UniProtKB=A0A2C9WG74	endosome	endomembrane system	endosome membrane;late endosome;early endosome;recycling endosome	891
GO:0000398	MANES|EnsemblGenome=MANES_13G142600|UniProtKB=A0A2C9UTR8	mRNA splicing, via spliceosome	RNA splicing, via transesterification reactions with bulged adenosine as nucleophile	mRNA cis splicing, via spliceosome;spliceosomal complex assembly;alternative mRNA splicing, via spliceosome;spliceosomal snRNP assembly	554
GO:0016192	MANES|EnsemblGenome=MANES_08G013100|UniProtKB=A0A2C9VCG2,MANES|EnsemblGenome=MANES_08G013200|UniProtKB=A0A2C9VCM0	vesicle-mediated transport	transport	endosomal transport;early endosome to late endosome transport;vesicle-mediated transport in synapse;vesicle-mediated transport to the plasma membrane;multivesicular body sorting pathway;late endosome to vacuole transport;vesicle budding from membrane;vesicle fusion;Golgi vesicle transport;vesicle targeting;endocytosis;endosome to lysosome transport;exocytosis	2234
PC00250	MANES|EnsemblGenome=MANES_18G097600|UniProtKB=A0A2C9U2X8	MADS box transcription factor	DNA-binding transcription factor		322
GO:0015267	MANES|EnsemblGenome=MANES_08G012800|UniProtKB=A0A2C9VDZ5	channel activity	passive transmembrane transporter activity	gated channel activity;monoatomic ion channel activity;wide pore channel activity	1392
PC00175	MANES|EnsemblGenome=MANES_04G007100|UniProtKB=A0A2C9W0N3	oxidase	oxidoreductase		766
GO:0005838	MANES|EnsemblGenome=MANES_13G142400|UniProtKB=A0A2C9UT52	proteasome regulatory particle	proteasome accessory complex	proteasome regulatory particle, lid subcomplex	123
GO:0065003	MANES|EnsemblGenome=MANES_17G097200|UniProtKB=A0A2C9U6N7	protein-containing complex assembly	protein-containing complex organization	protein-DNA complex assembly;protein-RNA complex assembly;cytochrome complex assembly;protein polymerization;mitochondrial proton-transporting ATP synthase complex assembly;chaperone-mediated protein complex assembly;axonemal dynein complex assembly;mitochondrial respiratory chain complex assembly;kinetochore assembly	1025
GO:0022857	MANES|EnsemblGenome=MANES_18G098800|UniProtKB=A0A2C9U1T5	transmembrane transporter activity	transporter activity	active transmembrane transporter activity;organic acid transmembrane transporter activity;efflux transmembrane transporter activity;carbohydrate derivative transmembrane transporter activity;monoatomic ion transmembrane transporter activity;passive transmembrane transporter activity;xenobiotic transmembrane transporter activity;protein transmembrane transporter activity;salt transmembrane transpo…	5430
PC00020	MANES|EnsemblGenome=MANES_05G076100|UniProtKB=A0A2C9VVN8	G-protein	protein-binding activity modulator	heterotrimeric G-protein;small GTPase	716
GO:0000278	MANES|EnsemblGenome=MANES_04G006100|UniProtKB=A0A2C9VYJ6	mitotic cell cycle	cell cycle	mitotic cell cycle process	927
PC00122	MANES|EnsemblGenome=MANES_17G096500|UniProtKB=A0A2C9U7F2,MANES|EnsemblGenome=MANES_17G096400|UniProtKB=A0A2C9U6J6	hydroxylase	oxidoreductase		257
GO:0003755	MANES|EnsemblGenome=MANES_04G006500|UniProtKB=A0A2C9VZT6	peptidyl-prolyl cis-trans isomerase activity	catalytic activity, acting on a protein		70
GO:0003677	MANES|EnsemblGenome=MANES_04G006100|UniProtKB=A0A2C9VYJ6	DNA binding	nucleic acid binding	single-stranded DNA binding;damaged DNA binding;sequence-specific DNA binding;chromatin DNA binding;double-stranded DNA binding;four-way junction DNA binding	5770
GO:0006284	MANES|EnsemblGenome=MANES_13G081400|UniProtKB=A0A2C9UQ62,MANES|EnsemblGenome=MANES_04G006100|UniProtKB=A0A2C9VYJ6	base-excision repair	DNA repair		64
PC00042	MANES|EnsemblGenome=MANES_18G115900|UniProtKB=A0A2C9U3E4,MANES|EnsemblGenome=MANES_18G116000|UniProtKB=A0A2C9U2G9	acyltransferase	transferase		539
PC00176	MANES|EnsemblGenome=MANES_02G169000|UniProtKB=A0A2C9WEP9,MANES|EnsemblGenome=MANES_13G081900|UniProtKB=A0A2C9UR55	oxidoreductase	metabolite interconversion enzyme	oxygenase;hydroxylase;peroxidase;reductase;dehydrogenase;oxidase	5706
PC00234	MANES|EnsemblGenome=MANES_08G012700|UniProtKB=A0A2C9VDQ6,MANES|EnsemblGenome=MANES_17G098600|UniProtKB=A0A2C9U6N0,MANES|EnsemblGenome=MANES_05G026300|UniProtKB=A0A2C9VSR8	ubiquitin-protein ligase	protein modifying enzyme		2396
PC00257	MANES|EnsemblGenome=MANES_05G076600|UniProtKB=A0A2C9VWF5	GTPase-activating protein	G-protein modulator		473
GO:0006412	MANES|EnsemblGenome=MANES_05G077000|UniProtKB=A0A2C9VUA0	translation	gene expression	translational initiation;translational termination;mitochondrial translation;cytoplasmic translation;translational elongation	970
GO:0045732	MANES|EnsemblGenome=MANES_08G013000|UniProtKB=A0A2C9VCG3	positive regulation of protein catabolic process	positive regulation of catabolic process	positive regulation of proteasomal protein catabolic process	207
PC00031	MANES|EnsemblGenome=MANES_13G142500|UniProtKB=A0A2C9URQ4,MANES|EnsemblGenome=MANES_13G142600|UniProtKB=A0A2C9UTR8,MANES|EnsemblGenome=MANES_13G082100|UniProtKB=A0A2C9UQ48	RNA metabolism protein	protein class	RNA helicase;RNA processing factor;general transcription factor;RNA methyltransferase;exoribonuclease;endoribonuclease;DNA-directed RNA polymerase	2848
GO:0005618	MANES|EnsemblGenome=MANES_01G029600|UniProtKB=A0A2C9WJT6	cell wall	external encapsulating structure	fungal-type cell wall	559
GO:0006357	MANES|EnsemblGenome=MANES_18G097600|UniProtKB=A0A2C9U2X8	regulation of transcription by RNA polymerase II	regulation of DNA-templated transcription	negative regulation of transcription by RNA polymerase II;positive regulation of transcription by RNA polymerase II	4514
GO:0005200	MANES|EnsemblGenome=MANES_05G025900|UniProtKB=A0A251KS14	structural constituent of cytoskeleton	structural molecule activity		166
GO:0003729	MANES|EnsemblGenome=MANES_02G169200|UniProtKB=A0A2C9WH30	mRNA binding	RNA binding	mRNA 3'-UTR binding	1238
PC00061	MANES|EnsemblGenome=MANES_02G169400|UniProtKB=A0A2C9WHB5	calmodulin-related	calcium-binding protein		438
GO:1901575	MANES|EnsemblGenome=MANES_05G076500|UniProtKB=A0A2C9VU66,MANES|EnsemblGenome=MANES_04G006900|UniProtKB=V5N4C3	organic substance catabolic process	catabolic process	lipid catabolic process;organonitrogen compound catabolic process;glycolytic process;organophosphate catabolic process;macromolecule catabolic process;organic acid catabolic process;carbohydrate derivative catabolic process;organic cyclic compound catabolic process	4242
GO:0003712	MANES|EnsemblGenome=MANES_13G082300|UniProtKB=A0A2C9UQ19	transcription coregulator activity	transcription regulator activity	transcription corepressor activity;transcription coactivator activity	635
GO:0016575	MANES|EnsemblGenome=MANES_04G007000|UniProtKB=A0A2C9VYD9	histone deacetylation	histone modification		66
GO:0007052	MANES|EnsemblGenome=MANES_05G025900|UniProtKB=A0A251KS14	mitotic spindle organization	microtubule cytoskeleton organization involved in mitosis	mitotic spindle assembly	163
GO:0006399	MANES|EnsemblGenome=MANES_11G120800|UniProtKB=A0A2C9V0M6	tRNA metabolic process	ncRNA metabolic process	tRNA processing	482
GO:0005048	MANES|EnsemblGenome=MANES_05G075600|UniProtKB=A0A2C9VU86	signal sequence binding	peptide binding		198
PC00208	MANES|EnsemblGenome=MANES_05G075900|UniProtKB=A0A2C9VWN1,MANES|EnsemblGenome=MANES_08G013100|UniProtKB=A0A2C9VCG2,MANES|EnsemblGenome=MANES_08G013200|UniProtKB=A0A2C9VCM0	small GTPase	G-protein		588
GO:0009908	MANES|EnsemblGenome=MANES_02G170100|UniProtKB=A0A2C9WF23	flower development	reproductive shoot system development	floral organ development	54
GO:0043565	MANES|EnsemblGenome=MANES_05G026700|UniProtKB=A0A2C9VSR4	sequence-specific DNA binding	DNA binding	telomeric DNA binding;sequence-specific double-stranded DNA binding	4623
GO:0009535	MANES|EnsemblGenome=MANES_05G075600|UniProtKB=A0A2C9VU86	chloroplast thylakoid membrane	chloroplast thylakoid		185
GO:0030515	MANES|EnsemblGenome=MANES_13G081200|UniProtKB=A0A2C9UQ39	snoRNA binding	RNA binding		68
GO:0019318	MANES|EnsemblGenome=MANES_05G076500|UniProtKB=A0A2C9VU66	hexose metabolic process	monosaccharide metabolic process	glucose metabolic process;hexose biosynthetic process	252
PC00096	MANES|EnsemblGenome=MANES_05G076500|UniProtKB=A0A2C9VU66	epimerase/racemase	isomerase		136
GO:0006508	MANES|EnsemblGenome=MANES_13G083000|UniProtKB=A0A2C9UQ58	proteolysis	protein metabolic process	protein modification by small protein removal;proteolysis involved in protein catabolic process;protein processing;membrane protein proteolysis	2876
PC00202	MANES|EnsemblGenome=MANES_16G105000|UniProtKB=A0A2C9UAR5,MANES|EnsemblGenome=MANES_04G006200|UniProtKB=A0A2C9W0M2,MANES|EnsemblGenome=MANES_02G169200|UniProtKB=A0A2C9WH30	ribosomal protein	translational protein		1560
GO:0006413	MANES|EnsemblGenome=MANES_05G027000|UniProtKB=A0A2C9VSR2	translational initiation	translation	cytoplasmic translational initiation	145
GO:0009507	MANES|EnsemblGenome=MANES_04G006900|UniProtKB=V5N4C3	chloroplast	plastid	chloroplast envelope;chloroplast thylakoid;chloroplast stroma	970
PC00047	MANES|EnsemblGenome=MANES_11G120800|UniProtKB=A0A2C9V0M6	aminoacyl-tRNA synthetase	translational protein		243
GO:0005794	MANES|EnsemblGenome=MANES_13G082500|UniProtKB=A0A2C9UQ13,MANES|EnsemblGenome=MANES_01G029800|UniProtKB=A0A2C9WIL5	Golgi apparatus	endomembrane system	COPI vesicle coat;Golgi transport complex;Golgi apparatus subcompartment;cis-Golgi network;Golgi membrane	2205
GO:0006614	MANES|EnsemblGenome=MANES_05G075600|UniProtKB=A0A2C9VU86	SRP-dependent cotranslational protein targeting to membrane	protein targeting to ER		55
GO:0009059	MANES|EnsemblGenome=MANES_17G097400|UniProtKB=A0A2C9U6M1	macromolecule biosynthetic process	macromolecule metabolic process	glycoprotein biosynthetic process;aminoglycan biosynthetic process;translational elongation;polysaccharide biosynthetic process;RNA biosynthetic process;DNA biosynthetic process;translation;lipoprotein biosynthetic process	2422
PC00097	MANES|EnsemblGenome=MANES_13G082400|UniProtKB=A0A2C9URC6	esterase	hydrolase		558
GO:0008643	MANES|EnsemblGenome=MANES_02G169700|UniProtKB=A0A2C9WEN7	carbohydrate transport	organic substance transport	carbohydrate transmembrane transport	277
PC00198	MANES|EnsemblGenome=MANES_17G098700|UniProtKB=A0A2C9U7H1	reductase	oxidoreductase		953
PC00177	MANES|EnsemblGenome=MANES_02G170100|UniProtKB=A0A2C9WF23	oxygenase	oxidoreductase		2000
GO:0004725	MANES|EnsemblGenome=MANES_18G099100|UniProtKB=A0A2C9U255	protein tyrosine phosphatase activity	phosphoprotein phosphatase activity		174
GO:0008610	MANES|EnsemblGenome=MANES_17G097400|UniProtKB=A0A2C9U6M1	lipid biosynthetic process	organic substance biosynthetic process	lipopolysaccharide biosynthetic process;phospholipid biosynthetic process;steroid biosynthetic process;isoprenoid biosynthetic process;fatty acid biosynthetic process;membrane lipid biosynthetic process;glycerolipid biosynthetic process	1296
GO:0016567	MANES|EnsemblGenome=MANES_08G013000|UniProtKB=A0A2C9VCG3	protein ubiquitination	protein modification by small protein conjugation	protein monoubiquitination;protein polyubiquitination	1379
GO:0051119	MANES|EnsemblGenome=MANES_02G169700|UniProtKB=A0A2C9WEN7	sugar transmembrane transporter activity	carbohydrate transmembrane transporter activity		153
PC00218	MANES|EnsemblGenome=MANES_18G098700|UniProtKB=A0A140H8T1,MANES|EnsemblGenome=MANES_05G026200|UniProtKB=A0A2C9VST0,MANES|EnsemblGenome=MANES_17G096300|UniProtKB=A0A2C9U6L5,MANES|EnsemblGenome=MANES_01G029300|UniProtKB=A0A140H8R4	DNA-binding transcription factor	gene-specific transcriptional regulator	helix-turn-helix transcription factor;MADS box transcription factor;HMG box transcription factor;zinc finger transcription factor;basic helix-loop-helix transcription factor;basic leucine zipper transcription factor;immunoglobulin fold transcription factor;SMAD-like transcription factor	3593
GO:0044390	MANES|EnsemblGenome=MANES_17G098600|UniProtKB=A0A2C9U6N0	ubiquitin-like protein conjugating enzyme binding	enzyme binding		200
GO:0008622	MANES|EnsemblGenome=MANES_04G006100|UniProtKB=A0A2C9VYJ6	epsilon DNA polymerase complex	nuclear chromosome		8
GO:0003887	MANES|EnsemblGenome=MANES_04G006100|UniProtKB=A0A2C9VYJ6	DNA-directed DNA polymerase activity	DNA polymerase activity		47
GO:0046394	MANES|EnsemblGenome=MANES_02G170100|UniProtKB=A0A2C9WF23	carboxylic acid biosynthetic process	organic acid biosynthetic process	amino acid biosynthetic process;icosanoid biosynthetic process;aromatic amino acid family biosynthetic process;monocarboxylic acid biosynthetic process;branched-chain amino acid biosynthetic process	856
PC00181	MANES|EnsemblGenome=MANES_01G029400|UniProtKB=A0A2C9WJL5	phosphatase	hydrolase	nucleotide phosphatase;carbohydrate phosphatase	848
GO:0016836	MANES|EnsemblGenome=MANES_08G012600|UniProtKB=A0A2C9VEQ6	hydro-lyase activity	carbon-oxygen lyase activity		241
GO:0022625	MANES|EnsemblGenome=MANES_02G169200|UniProtKB=A0A2C9WH30	cytosolic large ribosomal subunit	cytosolic ribosome		613
GO:0016706	MANES|EnsemblGenome=MANES_02G170100|UniProtKB=A0A2C9WF23	2-oxoglutarate-dependent dioxygenase activity	oxidoreductase activity, acting on paired donors, with incorporation or reduction of molecular oxygen		335
GO:0006289	MANES|EnsemblGenome=MANES_04G006100|UniProtKB=A0A2C9VYJ6	nucleotide-excision repair	DNA repair		131
GO:0016616	MANES|EnsemblGenome=MANES_18G116300|UniProtKB=A0A2C9U2Q5,MANES|EnsemblGenome=MANES_13G081900|UniProtKB=A0A2C9UR55	oxidoreductase activity, acting on the CH-OH group of donors, NAD or NADP as acceptor	oxidoreductase activity, acting on CH-OH group of donors	NAD-retinol dehydrogenase activity;estradiol 17-beta-dehydrogenase [NAD(P)] activity	849
GO:0045892	MANES|EnsemblGenome=MANES_13G082300|UniProtKB=A0A2C9UQ19	negative regulation of DNA-templated transcription	regulation of DNA-templated transcription	negative regulation of transcription by RNA polymerase II	689
GO:0019432	MANES|EnsemblGenome=MANES_18G115900|UniProtKB=A0A2C9U3E4,MANES|EnsemblGenome=MANES_18G116000|UniProtKB=A0A2C9U2G9	triglyceride biosynthetic process	glycerolipid biosynthetic process		97
PC00072	MANES|EnsemblGenome=MANES_17G097200|UniProtKB=A0A2C9U6N7,MANES|EnsemblGenome=MANES_04G006500|UniProtKB=A0A2C9VZT6	chaperone	protein class	Hsp100 family chaperone;Hsp60 family chaperone;Hsp90 family chaperone;chaperonin;Hsp70 family chaperone	1216
GO:0015926	MANES|EnsemblGenome=MANES_01G028900|UniProtKB=A0A2C9WHA4,MANES|EnsemblGenome=MANES_01G029000|UniProtKB=A0A2C9WHA2	glucosidase activity	hydrolase activity, hydrolyzing O-glycosyl compounds	alpha-glucosidase activity	275
PC00077	MANES|EnsemblGenome=MANES_13G082700|UniProtKB=A0A251JYH8	chromatin/chromatin-binding, or -regulatory protein	protein class	histone;histone modifying enzyme;centromere DNA-binding protein	1243
GO:0006271	MANES|EnsemblGenome=MANES_04G006100|UniProtKB=A0A2C9VYJ6	DNA strand elongation involved in DNA replication	DNA-templated DNA replication		39
GO:0045944	MANES|EnsemblGenome=MANES_13G082300|UniProtKB=A0A2C9UQ19	positive regulation of transcription by RNA polymerase II	regulation of transcription by RNA polymerase II	positive regulation of transcription elongation by RNA polymerase II	698
GO:0005819	MANES|EnsemblGenome=MANES_05G025900|UniProtKB=A0A251KS14	spindle	microtubule cytoskeleton	mitotic spindle;spindle pole;spindle midzone;spindle microtubule	232
GO:0000978	MANES|EnsemblGenome=MANES_18G097600|UniProtKB=A0A2C9U2X8	RNA polymerase II cis-regulatory region sequence-specific DNA binding	cis-regulatory region sequence-specific DNA binding		2789
GO:0005737	MANES|EnsemblGenome=MANES_05G027000|UniProtKB=A0A2C9VSR2,MANES|EnsemblGenome=MANES_04G006600|UniProtKB=A0A2C9VZS8,MANES|EnsemblGenome=MANES_17G098600|UniProtKB=A0A2C9U6N0,MANES|EnsemblGenome=MANES_01G028800|UniProtKB=A0A2C9WIK4,MANES|EnsemblGenome=MANES_05G025900|UniProtKB=A0A251KS14,MANES|EnsemblGenome=MANES_05G026500|UniProtKB=A0A2C9VSP6,MANES|EnsemblGenome=MANES_04G006700|UniProtKB=A0A2C9VYF7,…	cytoplasm	intracellular anatomical structure	SMN complex;endoplasmic reticulum;cell cortex;cytoplasmic vesicle;cytoplasmic microtubule;cytoplasmic region;sarcoplasmic reticulum;cytosol;cytoplasmic ribonucleoprotein granule;mitochondrion;SMN-Sm protein complex;microbody;endoplasmic reticulum-Golgi intermediate compartment;contractile fiber;perinuclear region of cytoplasm;pICln-Sm protein complex;vacuole;membrane coat;Golgi apparatus;phagopho…	24746
GO:0009067	MANES|EnsemblGenome=MANES_18G116300|UniProtKB=A0A2C9U2Q5	aspartate family amino acid biosynthetic process	alpha-amino acid biosynthetic process	lysine biosynthetic process	111
GO:0061630	MANES|EnsemblGenome=MANES_17G098600|UniProtKB=A0A2C9U6N0	ubiquitin protein ligase activity	ubiquitin-protein transferase activity		1028
GO:0008296	MANES|EnsemblGenome=MANES_13G081400|UniProtKB=A0A2C9UQ62,MANES|EnsemblGenome=MANES_04G006100|UniProtKB=A0A2C9VYJ6	3'-5'-DNA exonuclease activity	3'-5' exonuclease activity		28
PC00220	MANES|EnsemblGenome=MANES_02G168700|UniProtKB=A0A2C9WG57	transferase	metabolite interconversion enzyme	nucleotidyltransferase;methyltransferase;acetyltransferase;transketolase;glycosyltransferase;acyltransferase;transaldolase;transaminase;kinase	3053
GO:0009653	MANES|EnsemblGenome=MANES_18G097700|UniProtKB=A0A2C9U1S9	anatomical structure morphogenesis	anatomical structure development	cell morphogenesis;tissue morphogenesis;tube morphogenesis;morphogenesis of a branching structure;developmental growth involved in morphogenesis;cellular component morphogenesis;animal organ morphogenesis;establishment of planar polarity;anatomical structure formation involved in morphogenesis;embryonic morphogenesis	868
GO:0005741	MANES|EnsemblGenome=MANES_05G075900|UniProtKB=A0A2C9VWN1	mitochondrial outer membrane	organelle outer membrane	mitochondrial outer membrane translocase complex	172
GO:0005783	MANES|EnsemblGenome=MANES_17G097400|UniProtKB=A0A2C9U6M1	endoplasmic reticulum	cytoplasm	endoplasmic reticulum exit site;endoplasmic reticulum lumen;endoplasmic reticulum subcompartment;rough endoplasmic reticulum;endoplasmic reticulum protein-containing complex;sarcoplasmic reticulum	2281
PC00144	MANES|EnsemblGenome=MANES_13G082800|UniProtKB=A0A2C9UR51	lyase	metabolite interconversion enzyme	dehydratase;hydratase;aldolase;cyclase;decarboxylase	1379
PC00203	MANES|EnsemblGenome=MANES_04G005700|UniProtKB=A0A2C9VZR8,MANES|EnsemblGenome=MANES_16G104900|UniProtKB=A0A2C9UAN3	serine protease	protease		1274
GO:0032436	MANES|EnsemblGenome=MANES_17G098600|UniProtKB=A0A2C9U6N0	positive regulation of proteasomal ubiquitin-dependent protein catabolic process	positive regulation of ubiquitin-dependent protein catabolic process		178
GO:0044281	MANES|EnsemblGenome=MANES_08G012600|UniProtKB=A0A2C9VEQ6	small molecule metabolic process	metabolic process	small molecule biosynthetic process;monosaccharide metabolic process;small molecule catabolic process;organic acid metabolic process;nucleobase-containing small molecule metabolic process;alcohol metabolic process	4115
GO:0048367	MANES|EnsemblGenome=MANES_18G097700|UniProtKB=A0A2C9U1S9	shoot system development	system development	reproductive shoot system development;leaf development	98
GO:0005975	MANES|EnsemblGenome=MANES_04G006900|UniProtKB=V5N4C3	carbohydrate metabolic process	primary metabolic process	carbohydrate phosphorylation;monosaccharide metabolic process;carbohydrate biosynthetic process;glycolytic process;polysaccharide metabolic process	1236
PC00110	MANES|EnsemblGenome=MANES_01G028900|UniProtKB=A0A2C9WHA4,MANES|EnsemblGenome=MANES_01G029000|UniProtKB=A0A2C9WHA2	glycosidase	hydrolase		307
GO:0004674	MANES|EnsemblGenome=MANES_02G170400|UniProtKB=A0A2C9WHC2,MANES|EnsemblGenome=MANES_02G170200|UniProtKB=A0A2C9WH39,MANES|EnsemblGenome=MANES_04G006600|UniProtKB=A0A2C9VZS8,MANES|EnsemblGenome=MANES_02G170500|UniProtKB=A0A2C9WG83,MANES|EnsemblGenome=MANES_02G170600|UniProtKB=A0A2C9WG73,MANES|EnsemblGenome=MANES_04G006700|UniProtKB=A0A2C9VYF7	protein serine/threonine kinase activity	protein kinase activity	cyclin-dependent protein serine/threonine kinase activity;transmembrane receptor protein serine/threonine kinase activity	2363
GO:0002181	MANES|EnsemblGenome=MANES_02G169200|UniProtKB=A0A2C9WH30	cytoplasmic translation	translation	cytoplasmic translational initiation	315
PC00225	MANES|EnsemblGenome=MANES_05G077000|UniProtKB=A0A2C9VUA0	translation release factor	translation factor		44
GO:0032543	MANES|EnsemblGenome=MANES_11G120800|UniProtKB=A0A2C9V0M6	mitochondrial translation	mitochondrial gene expression		70
GO:0090599	MANES|EnsemblGenome=MANES_04G006900|UniProtKB=V5N4C3	alpha-glucosidase activity	glucosidase activity		42
PC00111	MANES|EnsemblGenome=MANES_18G098000|UniProtKB=A0A2C9U245	glycosyltransferase	transferase		1400
GO:0010008	MANES|EnsemblGenome=MANES_18G097800|UniProtKB=A0A2C9U252	endosome membrane	endosome	recycling endosome membrane;early endosome membrane;late endosome membrane;ESCRT I complex	274
GO:0000070	MANES|EnsemblGenome=MANES_05G025900|UniProtKB=A0A251KS14	mitotic sister chromatid segregation	mitotic nuclear division	mitotic sister chromatid separation;mitotic metaphase plate congression;mitotic spindle assembly;mitotic chromosome condensation	132
GO:0008320	MANES|EnsemblGenome=MANES_05G075600|UniProtKB=A0A2C9VU86	protein transmembrane transporter activity	transmembrane transporter activity		118
PC00155	MANES|EnsemblGenome=MANES_02G169500|UniProtKB=A0A2C9WG74	methyltransferase	transferase		787
GO:0043231	MANES|EnsemblGenome=MANES_01G030600|UniProtKB=A0A2C9WJU5	intracellular membrane-bounded organelle	intracellular organelle	intracellular vesicle;endoplasmic reticulum;nucleus;microbody;endoplasmic reticulum-Golgi intermediate compartment;cis-Golgi network;vacuole;Golgi apparatus;plastid;mitochondrion	23587
GO:0030154	MANES|EnsemblGenome=MANES_18G097700|UniProtKB=A0A2C9U1S9	cell differentiation	cellular developmental process	hematopoietic progenitor cell differentiation;osteoblast differentiation;myeloid cell differentiation;leukocyte differentiation;neurogenesis;cell development;melanocyte differentiation;vasculogenesis;cell fate commitment;glial cell differentiation;neuron differentiation;stem cell differentiation;muscle cell differentiation;spermatid differentiation;fat cell differentiation;epithelial cell differe…	1564
GO:0016773	MANES|EnsemblGenome=MANES_18G097800|UniProtKB=A0A2C9U252	phosphotransferase activity, alcohol group as acceptor	transferase activity, transferring phosphorus-containing groups	protein kinase activity;hexokinase activity	3628
GO:0005615	MANES|EnsemblGenome=MANES_16G104900|UniProtKB=A0A2C9UAN3	extracellular space	extracellular region	plasma lipoprotein particle	2412
GO:0003735	MANES|EnsemblGenome=MANES_16G105000|UniProtKB=A0A2C9UAR5,MANES|EnsemblGenome=MANES_02G169200|UniProtKB=A0A2C9WH30	structural constituent of ribosome	structural molecule activity		1007
PC00248	MANES|EnsemblGenome=MANES_01G029200|UniProtKB=A0A2C9WHN7	C2H2 zinc finger transcription factor	zinc finger transcription factor		1452
GO:1901362	MANES|EnsemblGenome=MANES_13G081900|UniProtKB=A0A2C9UR55	organic cyclic compound biosynthetic process	organic substance biosynthetic process	steroid biosynthetic process;nucleobase-containing compound biosynthetic process;aromatic amino acid family biosynthetic process;purine-containing compound biosynthetic process;heme biosynthetic process	1637
GO:0140535	MANES|EnsemblGenome=MANES_13G142600|UniProtKB=A0A2C9UTR8	intracellular protein-containing complex	protein-containing complex	mannosyltransferase complex;proteasome complex;endonuclease complex;protein acetyltransferase complex;TRAPP complex;DNA polymerase complex;protein folding chaperone complex;RNA polymerase complex;CCR4-NOT complex;ubiquitin ligase complex;elongator holoenzyme complex;ciliary transition fiber;guanyl-nucleotide exchange factor complex	2013
GO:0005874	MANES|EnsemblGenome=MANES_05G025900|UniProtKB=A0A251KS14	microtubule	microtubule cytoskeleton	microtubule plus-end;cytoplasmic microtubule;spindle microtubule	608
GO:0006470	MANES|EnsemblGenome=MANES_18G116200|UniProtKB=A0A2C9U3H0	protein dephosphorylation	protein modification process	peptidyl-tyrosine dephosphorylation	457
PC00197	MANES|EnsemblGenome=MANES_02G170400|UniProtKB=A0A2C9WHC2,MANES|EnsemblGenome=MANES_02G170200|UniProtKB=A0A2C9WH39,MANES|EnsemblGenome=MANES_02G170500|UniProtKB=A0A2C9WG83,MANES|EnsemblGenome=MANES_02G170600|UniProtKB=A0A2C9WG73,MANES|EnsemblGenome=MANES_18G097400|UniProtKB=A0A2C9U3L7	transmembrane signal receptor	protein class	G-protein coupled receptor;serine/threonine protein kinase receptor;tyrosine protein kinase receptor;histidine kinase receptor of two-component system	3848
GO:0000209	MANES|EnsemblGenome=MANES_17G098600|UniProtKB=A0A2C9U6N0,MANES|EnsemblGenome=MANES_05G026300|UniProtKB=A0A2C9VSR8	protein polyubiquitination	protein ubiquitination	protein K63-linked ubiquitination;protein K48-linked ubiquitination;protein K11-linked ubiquitination	533
GO:0007005	MANES|EnsemblGenome=MANES_05G075900|UniProtKB=A0A2C9VWN1	mitochondrion organization	organelle organization	apoptotic mitochondrial changes;mitochondrial membrane organization;autophagy of mitochondrion;mitochondrial fusion;protein targeting to mitochondrion;mitochondrial proton-transporting ATP synthase complex assembly;mitochondrial genome maintenance;mitochondrial respiratory chain complex assembly;mitochondrial fission	594
PC00153	MANES|EnsemblGenome=MANES_13G083000|UniProtKB=A0A2C9UQ58	metalloprotease	protease		756
PC00068	MANES|EnsemblGenome=MANES_17G097600|UniProtKB=A0A2C9U7F9	primary active transporter	transporter	ATP-binding cassette (ABC) transporter;ATP synthase	1638
GO:0005813	MANES|EnsemblGenome=MANES_05G025900|UniProtKB=A0A251KS14	centrosome	microtubule organizing center	centriolar satellite	311
GO:0006355	MANES|EnsemblGenome=MANES_05G026700|UniProtKB=A0A2C9VSR4	regulation of DNA-templated transcription	regulation of RNA biosynthetic process	regulation of DNA-templated transcription elongation;negative regulation of DNA-templated transcription;regulation of transcription by RNA polymerase II;regulation of DNA-binding transcription factor activity;regulation of transcription by RNA polymerase I;positive regulation of DNA-templated transcription	6470
GO:0043022	MANES|EnsemblGenome=MANES_05G077000|UniProtKB=A0A2C9VUA0	ribosome binding	ribonucleoprotein complex binding		151
PC00190	MANES|EnsemblGenome=MANES_13G081000|UniProtKB=A0A2C9UR47,MANES|EnsemblGenome=MANES_13G142400|UniProtKB=A0A2C9UT52	protease	protein modifying enzyme	serine protease;aspartic protease;metalloprotease;cysteine protease	2019
GO:0008081	MANES|EnsemblGenome=MANES_13G081400|UniProtKB=A0A2C9UQ62	phosphoric diester hydrolase activity	phosphoric ester hydrolase activity	cyclic-nucleotide phosphodiesterase activity;phospholipase C activity	290
GO:0005739	MANES|EnsemblGenome=MANES_11G120800|UniProtKB=A0A2C9V0M6,MANES|EnsemblGenome=MANES_05G075800|UniProtKB=A0A2C9VU98,MANES|EnsemblGenome=MANES_13G142700|UniProtKB=A0A2C9URJ9	mitochondrion	cytoplasm	mitochondrial matrix;mitochondrial envelope;mitochondrial protein-containing complex	2632
GO:0008104	MANES|EnsemblGenome=MANES_18G097500|UniProtKB=A0A2C9U313	protein localization	cellular macromolecule localization	establishment of protein localization;protein localization to membrane;intracellular protein transport;protein localization to cell junction;protein localization to organelle;protein localization to cell periphery;protein insertion into membrane;protein localization to extracellular region	2175
GO:0009451	MANES|EnsemblGenome=MANES_01G030600|UniProtKB=A0A2C9WJU5	RNA modification	RNA metabolic process	chloroplast RNA modification;mRNA modification;pseudouridine synthesis;rRNA modification;adenosine to inosine editing;RNA methylation;mitochondrial RNA modification;tRNA modification	579
PC00224	MANES|EnsemblGenome=MANES_05G027000|UniProtKB=A0A2C9VSR2	translation initiation factor	translation factor		518
PC00142	MANES|EnsemblGenome=MANES_17G097400|UniProtKB=A0A2C9U6M1	ligase	metabolite interconversion enzyme		522
GO:0005509	MANES|EnsemblGenome=MANES_02G169400|UniProtKB=A0A2C9WHB5	calcium ion binding	metal ion binding		694
GO:0043232	MANES|EnsemblGenome=MANES_13G142400|UniProtKB=A0A2C9UT52	intracellular non-membrane-bounded organelle	non-membrane-bounded organelle	ribosome;cytoskeleton;chromosome;thylakoid;contractile fiber;ribonucleoprotein granule;centriole;nucleolus;lipid droplet;spindle;kinetochore	5585
PC00167	MANES|EnsemblGenome=MANES_11G120900|UniProtKB=A0A2C9V275	non-receptor serine/threonine protein kinase	protein modifying enzyme		2047
GO:0018193	MANES|EnsemblGenome=MANES_04G006500|UniProtKB=A0A2C9VZT6	peptidyl-amino acid modification	protein modification process	peptidyl-lysine modification;peptidyl-threonine phosphorylation;peptidyl-tyrosine modification;peptidyl-serine modification	1233
GO:0005802	MANES|EnsemblGenome=MANES_02G169500|UniProtKB=A0A2C9WG74	trans-Golgi network	Golgi apparatus subcompartment	trans-Golgi network membrane	487
GO:0005372	MANES|EnsemblGenome=MANES_08G012800|UniProtKB=A0A2C9VDZ5	water transmembrane transporter activity	salt transmembrane transporter activity		129
GO:0043161	MANES|EnsemblGenome=MANES_13G142400|UniProtKB=A0A2C9UT52	proteasome-mediated ubiquitin-dependent protein catabolic process	proteasomal protein catabolic process	anaphase-promoting complex-dependent catabolic process;ubiquitin-dependent ERAD pathway;SCF-dependent proteasomal ubiquitin-dependent protein catabolic process	898
GO:0000462	MANES|EnsemblGenome=MANES_13G142500|UniProtKB=A0A2C9URQ4	maturation of SSU-rRNA from tricistronic rRNA transcript (SSU-rRNA, 5.8S rRNA, LSU-rRNA)	maturation of SSU-rRNA	endonucleolytic cleavage in ITS1 to separate SSU-rRNA from 5.8S rRNA and LSU-rRNA from tricistronic rRNA transcript (SSU-rRNA, 5.8S rRNA, LSU-rRNA)	97
GO:0009826	MANES|EnsemblGenome=MANES_02G170100|UniProtKB=A0A2C9WF23	unidimensional cell growth	developmental growth involved in morphogenesis		39
GO:0048856	MANES|EnsemblGenome=MANES_17G097400|UniProtKB=A0A2C9U6M1	anatomical structure development	developmental process	retina development in camera-type eye;tube development;dendrite development;tissue development;plant organ development;blood vessel development;system development;reproductive structure development;inner ear development;cell development;lens development in camera-type eye;anatomical structure morphogenesis;animal organ development;lymph vessel development;muscle structure development;head develop…	2347
GO:0044237	MANES|EnsemblGenome=MANES_08G012600|UniProtKB=A0A2C9VEQ6	cellular metabolic process	cellular process	sulfur compound metabolic process;generation of precursor metabolites and energy;cellular aromatic compound metabolic process;heterocycle metabolic process;phosphorus metabolic process;translational initiation;cellular catabolic process;cellular nitrogen compound metabolic process;cellular lipid metabolic process;organic acid metabolic process;cellular biosynthetic process;photosynthesis	13410
PC00227	MANES|EnsemblGenome=MANES_05G075600|UniProtKB=A0A2C9VU86,MANES|EnsemblGenome=MANES_18G098800|UniProtKB=A0A2C9U1T5,MANES|EnsemblGenome=MANES_05G025700|UniProtKB=A0A2C9VSQ5	transporter	protein class	primary active transporter;secondary carrier transporter;ion channel	8034
GO:0140657	MANES|EnsemblGenome=MANES_17G097400|UniProtKB=A0A2C9U6M1,MANES|EnsemblGenome=MANES_13G083000|UniProtKB=A0A2C9UQ58	ATP-dependent activity	molecular_function	P-type ion transporter activity;microtubule motor activity;microfilament motor activity;ATPase-coupled intramembrane lipid transporter activity;ATP-dependent activity, acting on DNA;helicase activity;ATP hydrolysis activity	1923
GO:0032040	MANES|EnsemblGenome=MANES_13G142500|UniProtKB=A0A2C9URQ4,MANES|EnsemblGenome=MANES_13G081200|UniProtKB=A0A2C9UQ39	small-subunit processome	preribosome		128
GO:0022627	MANES|EnsemblGenome=MANES_16G105000|UniProtKB=A0A2C9UAR5	cytosolic small ribosomal subunit	cytosolic ribosome		357
GO:0006520	MANES|EnsemblGenome=MANES_11G120800|UniProtKB=A0A2C9V0M6	amino acid metabolic process	organonitrogen compound metabolic process	aromatic amino acid metabolic process;amino acid biosynthetic process;amino acid catabolic process;branched-chain amino acid metabolic process;alpha-amino acid metabolic process	1205

## Sheet: supp2
	Supplementary Table 2
1	transporter activity (GO:0005215)	57730	0.054	0.045
2	No PANTHER category is assigned (UNCLASSIFIED)	392836	0.366	0.307
3	translation regulator activity (GO:0045182)	6507	0.006	0.005
4	cargo receptor activity (GO:0038024)	285	0	0
5	transcription regulator activity (GO:0140110)	63585	0.059	0.05
6	catalytic activity (GO:0003824)	355970	0.332	0.278
7	molecular function regulator activity (GO:0098772)	32066	0.03	0.025
8	cytoskeletal motor activity (GO:0003774)	4178	0.004	0.003
9	ATP-dependent activity (GO:0140657)	33222	0.031	0.026
10	molecular transducer activity (GO:0060089)	24283	0.023	0.019
11	molecular adaptor activity (GO:0060090)	3810	0.004	0.003
12	antioxidant activity (GO:0016209)	5715	0.005	0.004
13	structural molecule activity (GO:0005198)	25531	0.024	0.02
14	binding (GO:0005488)	272888	0.254	0.213

## Sheet: Sheet3
	Supplementary Table 3
1	cellular anatomical entity (GO:0110165)	665996	0.62	0.546
2	protein-containing complex (GO:0032991)	158904	0.148	0.13
3	No PANTHER category is assigned (UNCLASSIFIED)	394013	0.367	0.323
